# Supplementary material
Source: PubMed Central journal article supplement (PMC9158510)

# Supplemental Materials

**Supplemental Materials:**

**Supplemental Methods**

**Supplemental Tables I-VIII**

**Supplemental Figures I-V**

## **Supplemental Methods**

### **Methods for Absolute Quantification of Representative Metabolites**

Of the significant metabolites highlighted in the manuscript, we selected four for which we were able to obtain stable isotope labeled reference material and created calibration curves by serially diluting each in pooled reference plasma. Calibration curves were fitted using linear regression and we re-analyzed a subset of 50 JHS plasma samples that were representative the peak area range for each metabolite measured in the full dataset. The squared regression coefficient ( $R^2$ ) value for each stable isotope labeled reference standard indicates a high correlation between concentration and peak area in the plasma matrix ( $^{13}\text{C}_7$ ,  $^{14}\text{N}_4$ -homoarginine 0.984; Choline- $\text{d}_4$  0.981; 3-Methylhistidine- $\text{d}_3$  0.996; ; 2AA- $\text{d}_3$  0.998; Uridine 15N2 0.999). These analyses also showed that that range of peak areas measured in the JHS samples fell within the linear response range of the LC-MS analysis. Last, the re-analysis of the 50 representative JHS samples demonstrated excellent reproducibility in comparison to the original dataset. The Pearson correlation coefficients between the re-analyzed and original sample data were: homoarginine 0.912, choline 0.914, 3-methylhistidine 0.866, , 2AA- $\text{d}_3$  0.968, Uridine 15N2 0.999.

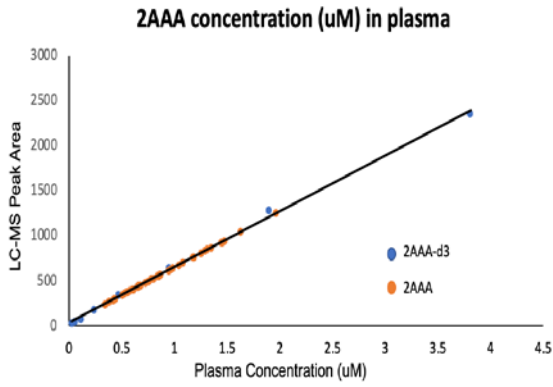

|                   |                                |
|-------------------|--------------------------------|
| HMDB Info:        |                                |
| Biospecimen       | Value                          |
| Blood             | 0.3-3.4 uM                     |
| <i>JHS plasma</i> | <b><i>0.84 +/- 0.37 uM</i></b> |

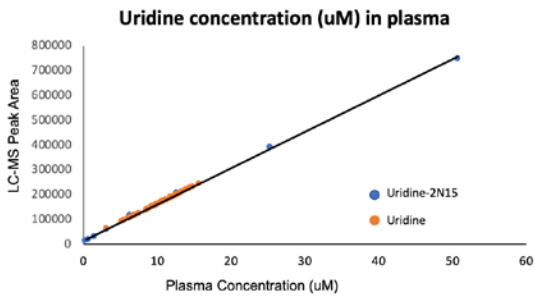

|                   |                            |
|-------------------|----------------------------|
| HMDB Info         |                            |
| Biospecimen       | Value                      |
| Blood             | 6.15 +/- 5.33              |
| <i>JHS plasma</i> | <b><i>10.6 +/- 2.8</i></b> |

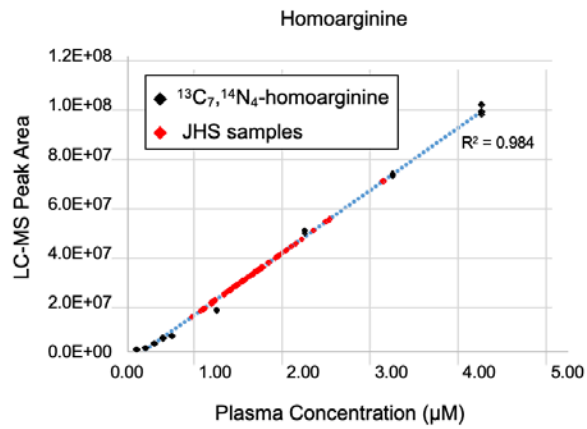

|                   |                      |
|-------------------|----------------------|
| HMDB Info         |                      |
| Biospecimen       | Value                |
| Blood             | 1.12 +/- 0.60        |
| <i>JHS plasma</i> | <b>1.41 +/- 0.41</b> |

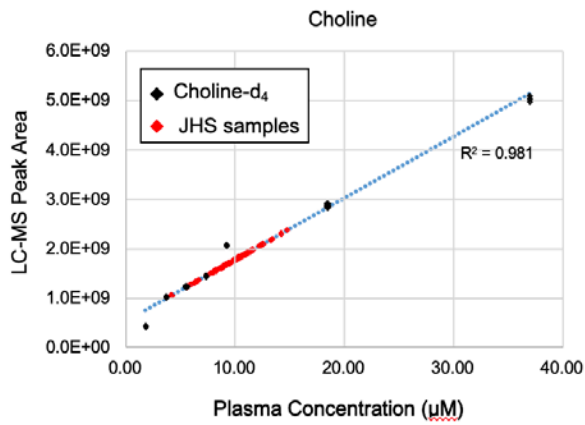

|                   |                         |
|-------------------|-------------------------|
| HMDB Info:        |                         |
| Biospecimen       | Value                   |
| Blood             | 10.6 +/- 1.9 uM         |
| <i>JHS plasma</i> | <b>9.51 +/- 2.22 uM</b> |

# Spectral Peaks for Highlighted Metabolites: Random sample spectral peaks overlaying stable isotope peak (bottom)

## 1. Uridine

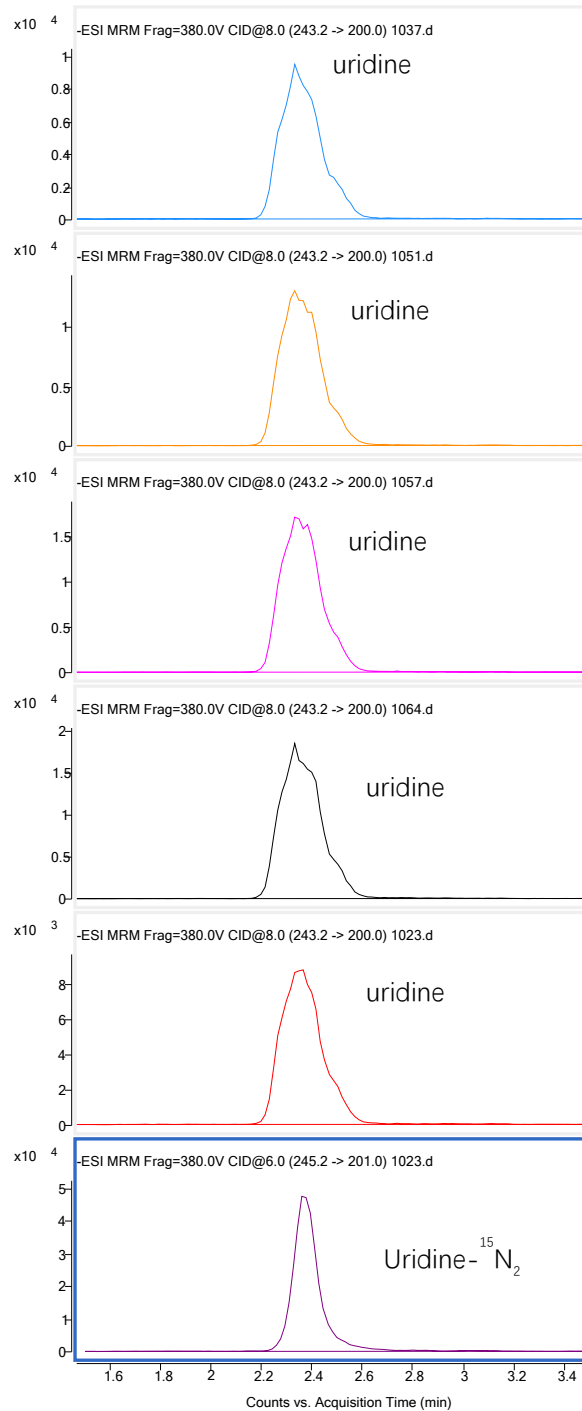

## 2. Homoarginine

RT :0.00-16.00 SM: 5G

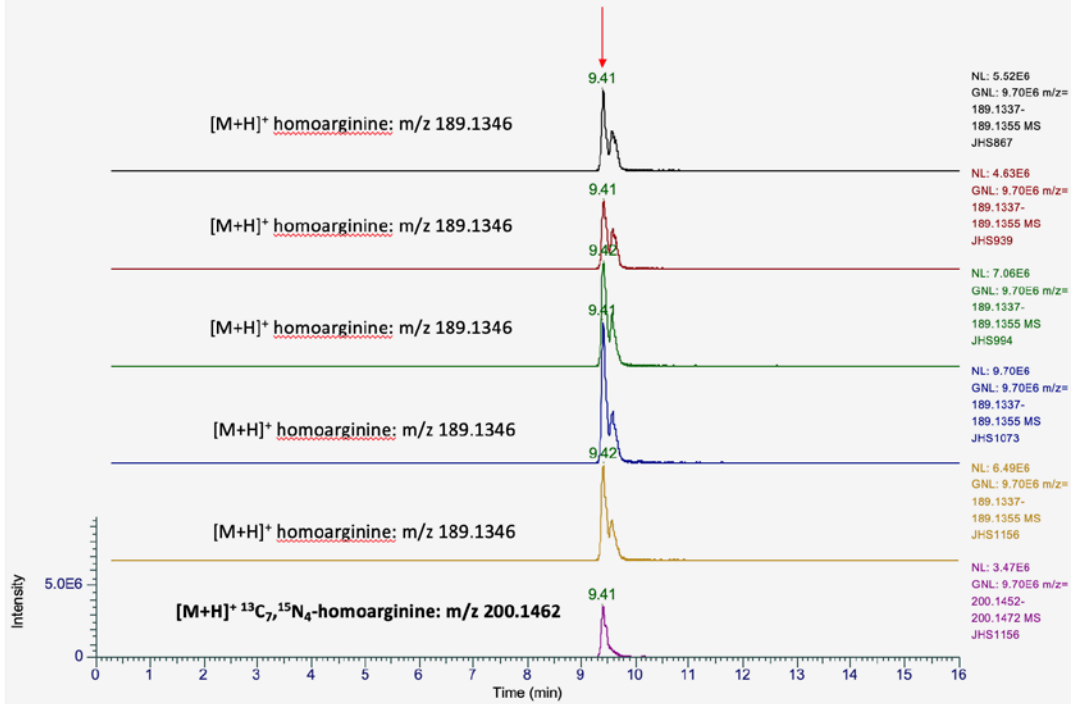

### 3. Choline

RT :0.00-16.00 SM: 5G

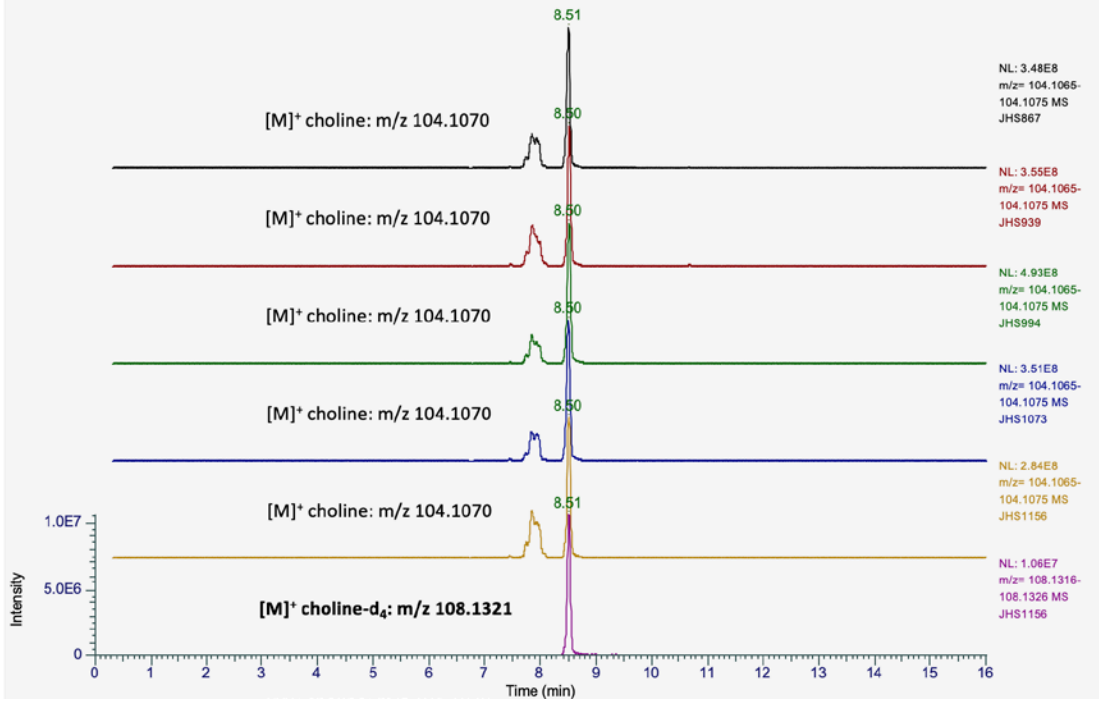

## 4. 2-Amino adipic acid

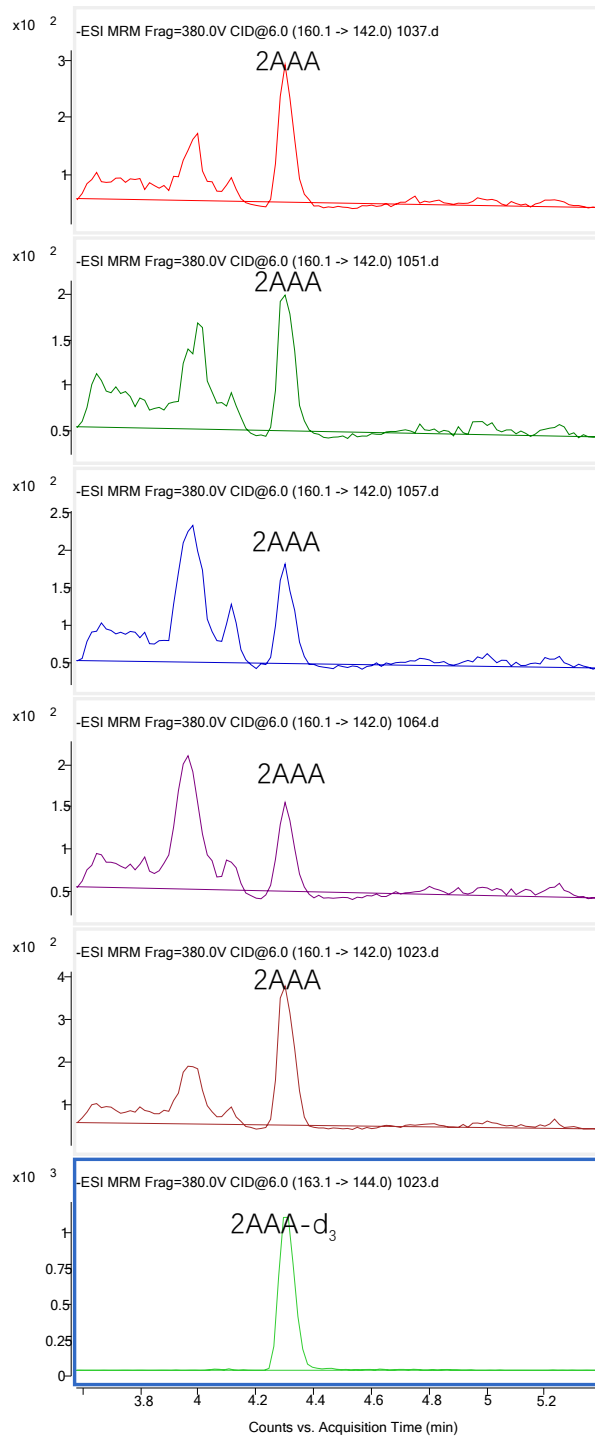

**Table I: Clinical characteristics between the entire Jackson Heart Study, available and profiled samples.**

| <b>Clinical Trait</b>        | <b>Full Cohort<br/>(N=5306)</b> | <b>Available Samples<br/>(N= 3221)</b> | <b>Samples Profiled<br/>(N=2750)</b> |
|------------------------------|---------------------------------|----------------------------------------|--------------------------------------|
| <b>Age, mean (SD)</b>        | 55.4 (12.8)                     | 55.6 (12.8)                            | 56.4 (12.7)                          |
| <b>BMI, mean (SD)</b>        | 31.8 (7.2)                      | 32 (7.3)                               | 31.7 (7.1)                           |
| <b>eGFR, mean (SD)</b>       | 85.7 (18.5)                     | 85.5 (18.8)                            | 84.8 (19)                            |
| <b>TC, mean (SD)</b>         | 199 (40.1)                      | 199.4 (40.9)                           | 200 (41)                             |
| <b>HDL, mean (SD)</b>        | 51.8 (14.6)                     | 51.6 (14.7)                            | 51.8 (14.7)                          |
| <b>sbp, mean (SD)</b>        | 127 (18.4)                      | 127.5 (16.6)                           | 127 (18.2)                           |
| <b>Male, n (%)</b>           | 1934 (36.5)                     | 1224 (38)                              | 1046 (38)                            |
| <b>Current Smoker, n (%)</b> | 693 (13.1)                      | 419 (13)                               | 335 (12.2)                           |
| <b>HTN, n (%)</b>            | 3252 (61.3)                     | 1836 (57)                              | 1746 (63.5)                          |
| <b>Diabetes, n (%)</b>       | 1152 (21.7)                     | 741 (23)                               | 659 (24)                             |

BMI: body mass index; eGFR: estimated glomerular filtration rate; TC: total cholesterol, HDL: high density lipid lipoprotein; sbp: systolic blood pressure; HTN: hypertension



**Table II: Age, sex and batch adjusted analysis for metabolites and incident HF**

| <b>Metabolites</b>               | <b>Hazard ratio</b> | <b>P value</b> | <b>FDR</b> |
|----------------------------------|---------------------|----------------|------------|
| <b>pseudouridine</b>             | 1.68 (1.51-1.87)    | 5.69E-22       | 1.75E-19   |
| <b>4-acetamidobutanoate</b>      | 1.55 (1.4-1.7)      | 1.01E-18       | 1.55E-16   |
| <b>D.Gluconic.acid</b>           | 1.72 (1.51-1.96)    | 7.93E-16       | 8.14E-14   |
| <b>2.deoxyuridine</b>            | 1.69 (1.48-1.92)    | 1.13E-15       | 8.67E-14   |
| <b>N2.N2.dimethylguanosine</b>   | 1.49 (1.34-1.65)    | 1.39E-13       | 7.12E-12   |
| <b>DMGV</b>                      | 1.9 (1.6-2.25)      | 1.36E-13       | 8.38E-12   |
| <b>creatinine</b>                | 1.57 (1.38-1.78)    | 3.03E-12       | 1.33E-10   |
| <b>1-methyladenosine</b>         | 1.57 (1.37-1.81)    | 2.22E-10       | 8.55E-09   |
| <b>Uridine</b>                   | 0.719 (0.648-0.798) | 4.38E-10       | 1.50E-08   |
| <b>methylhistidine</b>           | 1.5 (1.31-1.72)     | 4.23E-09       | 1.30E-07   |
| <b>N.carbamoyl.beta.alanine</b>  | 1.31 (1.19-1.43)    | 8.24E-09       | 2.12E-07   |
| <b>choline</b>                   | 1.53 (1.32-1.77)    | 8.11E-09       | 2.27E-07   |
| <b>N6.acetyllysine</b>           | 1.42 (1.26-1.61)    | 1.01E-08       | 2.40E-07   |
| <b>N4.acetylcytidine</b>         | 1.47 (1.29-1.68)    | 1.71E-08       | 3.75E-07   |
| <b>C4.carnitine</b>              | 1.43 (1.25-1.62)    | 5.06E-08       | 1.04E-06   |
| <b>1-5-AG...1.deoxyglucose</b>   | 0.739 (0.661-0.826) | 9.73E-08       | 1.87E-06   |
| <b>allantoin</b>                 | 1.52 (1.3-1.78)     | 1.84E-07       | 3.34E-06   |
| <b>diacetylspermine</b>          | 1.45 (1.25-1.69)    | 9.04E-07       | 1.46E-05   |
| <b>N1.acetylspermidine</b>       | 1.4 (1.23-1.61)     | 8.56E-07       | 1.47E-05   |
| <b>C3.DC.CH3.carnitine</b>       | 1.42 (1.24-1.64)    | 1.10E-06       | 1.70E-05   |
| <b>N.acetylalanine</b>           | 1.42 (1.23-1.64)    | 1.99E-06       | 2.67E-05   |
| <b>trigonelline</b>              | 1.44 (1.24-1.67)    | 1.94E-06       | 2.72E-05   |
| <b>Quinolinic.acid</b>           | 1.37 (1.2-1.55)     | 1.94E-06       | 2.84E-05   |
| <b>acetylglutamic.acid</b>       | 1.34 (1.18-1.51)    | 3.68E-06       | 4.54E-05   |
| <b>trimethylamine.N.oxide</b>    | 1.36 (1.19-1.54)    | 3.55E-06       | 4.55E-05   |
| <b>N6.N6.dimethyllysine</b>      | 1.32 (1.17-1.49)    | 4.10E-06       | 4.86E-05   |
| <b>S.Adenosyl.L.homocysteine</b> | 1.35 (1.19-1.54)    | 6.06E-06       | 6.67E-05   |
| <b>N.acetylputrescine</b>        | 1.38 (1.2-1.59)     | 5.89E-06       | 6.72E-05   |
| <b>1-methylnicotinamide</b>      | 0.733 (0.638-0.842) | 1.08E-05       | 0.000114   |
| <b>phenylacetylglutamine</b>     | 1.44 (1.22-1.7)     | 1.28E-05       | 0.000132   |
| <b>cystine</b>                   | 1.5 (1.25-1.82)     | 1.99E-05       | 0.000198   |
| <b>N6.N6.N6.trimethyllysine</b>  | 1.34 (1.17-1.54)    | 2.15E-05       | 0.000207   |
| <b>biliverdin</b>                | 0.751 (0.655-0.861) | 3.98E-05       | 0.000361   |
| <b>homoarginine</b>              | 0.748 (0.651-0.859) | 3.89E-05       | 0.000363   |
| <b>ectoine</b>                   | 1.34 (1.16-1.54)    | 5.06E-05       | 0.000445   |
| <b>C7.carnitine</b>              | 1.33 (1.16-1.52)    | 5.28E-05       | 0.000452   |
| <b>hydroxyproline</b>            | 1.3 (1.15-1.49)     | 5.59E-05       | 0.000466   |

|                                  |                     |          |          |
|----------------------------------|---------------------|----------|----------|
| <b>acisoga</b>                   | 1.35 (1.16-1.56)    | 6.57E-05 | 0.000532 |
| <b>C4.OH.carnitine</b>           | 1.32 (1.15-1.51)    | 7.40E-05 | 0.000585 |
| <b>ADMA</b>                      | 1.31 (1.15-1.5)     | 7.65E-05 | 0.000589 |
| <b>imidazole.propionate</b>      | 1.3 (1.14-1.49)     | 9.21E-05 | 0.000692 |
| <b>4-aminohippuric.acid</b>      | 1.29 (1.13-1.47)    | 0.000131 | 0.00096  |
| <b>3-hydroxyhippurate</b>        | 1.3 (1.13-1.48)     | 0.000157 | 0.00112  |
| <b>1-methylguanine</b>           | 1.3 (1.13-1.49)     | 0.000185 | 0.0013   |
| <b>kynurenic.acid</b>            | 1.31 (1.14-1.51)    | 0.000194 | 0.0013   |
| <b>SDMA</b>                      | 1.3 (1.13-1.49)     | 0.000192 | 0.00132  |
| <b>N.acetylserine</b>            | 1.31 (1.13-1.5)     | 0.000203 | 0.00133  |
| <b>N.acetyltryptophan</b>        | 1.32 (1.14-1.53)    | 0.000284 | 0.00182  |
| <b>C5.carnitine</b>              | 1.28 (1.12-1.47)    | 0.000396 | 0.00249  |
| <b>C5.1.carnitine</b>            | 1.3 (1.12-1.5)      | 0.000569 | 0.00351  |
| <b>C3.carnitine</b>              | 1.29 (1.12-1.49)    | 0.000591 | 0.00357  |
| <b>C6.carnitine</b>              | 1.25 (1.1-1.42)     | 0.000675 | 0.00385  |
| <b>N.acetylaspatic.acid</b>      | 1.27 (1.11-1.46)    | 0.000657 | 0.00389  |
| <b>hydroxycotinine_impute</b>    | 1.24 (1.1-1.41)     | 0.00067  | 0.00389  |
| <b>1-methylhistamine</b>         | 1.26 (1.1-1.44)     | 0.000827 | 0.00455  |
| <b>N.Acetyl.L.Glutamic.acid</b>  | 1.28 (1.11-1.48)    | 0.00082  | 0.00459  |
| <b>tryptophan</b>                | 0.79 (0.688-0.908)  | 0.00085  | 0.00459  |
| <b>2-Hydroxyglutaric.acid</b>    | 1.26 (1.1-1.45)     | 0.00096  | 0.0051   |
| <b>urate</b>                     | 1.28 (1.11-1.49)    | 0.00111  | 0.00578  |
| <b>Hydroxyphenylpyruvic.acid</b> | 1.34 (1.12-1.6)     | 0.00146  | 0.00748  |
| <b>Indole.3.lactic.acid</b>      | 1.26 (1.09-1.45)    | 0.00157  | 0.00791  |
| <b>C10.2.carnitine</b>           | 1.27 (1.09-1.48)    | 0.00176  | 0.00873  |
| <b>7-methylguanine</b>           | 1.25 (1.08-1.44)    | 0.00202  | 0.00989  |
| <b>C5.DC.carnitine</b>           | 1.24 (1.08-1.42)    | 0.00219  | 0.0105   |
| <b>Oleoyl.Leucine</b>            | 0.784 (0.67-0.918)  | 0.00242  | 0.0113   |
| <b>C38.4.PE</b>                  | 1.25 (1.08-1.45)    | 0.00239  | 0.0113   |
| <b>1-methylguanosine</b>         | 1.24 (1.08-1.42)    | 0.0025   | 0.0115   |
| <b>Aconitic.acid</b>             | 1.32 (1.1-1.58)     | 0.00284  | 0.0129   |
| <b>cotinine</b>                  | 1.21 (1.07-1.38)    | 0.00348  | 0.0155   |
| <b>Orotic.acid</b>               | 1.18 (1.05-1.32)    | 0.00536  | 0.0236   |
| <b>C36.4.PE</b>                  | 1.23 (1.06-1.42)    | 0.00591  | 0.0257   |
| <b>dimethylglycine</b>           | 1.17 (1.05-1.31)    | 0.00614  | 0.0263   |
| <b>Oxaloacetic.acid</b>          | 1.2 (1.05-1.37)     | 0.00629  | 0.0266   |
| <b>trimethylbenzene</b>          | 0.822 (0.714-0.946) | 0.00645  | 0.0269   |
| <b>histidine</b>                 | 0.831 (0.724-0.953) | 0.00825  | 0.0339   |
| <b>threonine</b>                 | 0.826 (0.715-0.953) | 0.00885  | 0.0359   |
| <b>lysine</b>                    | 0.84 (0.737-0.958)  | 0.00932  | 0.0373   |

|                   |                     |         |        |
|-------------------|---------------------|---------|--------|
| <b>hippurate</b>  | 1.2 (1.05-1.38)     | 0.00953 | 0.0376 |
| <b>methionine</b> | 0.832 (0.723-0.959) | 0.0108  | 0.0422 |
| <b>C34.2.PE</b>   | 1.21 (1.04-1.39)    | 0.0111  | 0.0427 |
| <b>C36.2.PE</b>   | 1.2 (1.04-1.39)     | 0.0125  | 0.0475 |

**Table III: Coefficient of variation for metabolites associated with incident heart failure in multivariate model**

| <b>Metabolite</b>       | <b>CV %*</b> |
|-------------------------|--------------|
| N1-acetylspermidine     | 2.1          |
| choline                 | 2.1          |
| methylhistidine         | 2.9          |
| 4-acetamidobutanoate    | 3.1          |
| pseudouridine           | 3.5          |
| DMGV                    | 3.6          |
| uridine                 | 4.1          |
| ectoine                 | 4.3          |
| homoarginine            | 5.1          |
| 2-deoxyuridine          | 8.7          |
| N2-N2-dimethylguanosine | 9.0          |
| diacetylspermine        | 15.4         |
| 2-aminoadipic acid      | 16.3         |
| N-acetyl-l-alanine      | 18.4         |

\*Averaged across batches

CV: Coefficient of Variation

**Table IV: Baseline Characteristics for Cases and Controls of Incident Heart Failure in the Framingham Heart Study**

|                                    | Cases (n=216) | Controls (n=2157) | Cohort (n=2373) |
|------------------------------------|---------------|-------------------|-----------------|
| Age, y                             | 63 (9)        | 54 (10)           | 55(10)          |
| Female sex n (%)                   | 93 (43)       | 1164 (54)         | 1257 (53)       |
| BMI                                | 29.8 (5.5)    | 27.3 (4.8)        | 27.5 (4.9)      |
| SBP                                | 137 (21)      | 125 (18)          | 126 (19)        |
| Hypertension (%)                   | 137 (63)      | 686 (32)          | 823 (35)        |
| Total cholesterol (mg/dl)          | 207 (41)      | 206 (36)          | 206 (37)        |
| HDL (mg/dl)                        | 45 (14)       | 50 (15)           | 50 (15)         |
| Smoker n (%)                       | 36 (17)       | 397 (18)          | 433 (18)        |
| CHD History n (%)                  | 12 (6)        | 21 (1)            | 33 (1)          |
| Diabetes n (%)                     | 43 (20)       | 107 (5)           | 150 (6)         |
| eGFR (mL/min/1.73 m <sup>2</sup> ) | 81.2 (19.9)   | 89.5 (19.0)       | 88.8 (19.2)     |

BMI: body mass index; SBP: systolic blood pressure; DBP: diastolic blood pressure; TC: total cholesterol; HDL: high density lipoprotein; eGFR: estimated glomerular filtration rate; CHD: coronary heart disease; HTN: hypertension

**Table V: Association of metabolites with echocardiographic variables in multi-variate model**

| Metabolites                 |        | Beta-coefficient           | P value         |
|-----------------------------|--------|----------------------------|-----------------|
| <b>Pseudouridine</b>        | IVS    | 0.097 (0.066-0.128)        | <b>0.00175</b>  |
|                             | LVEDD  | 0.0177 (-0.014-0.0495)     | 0.577           |
|                             | PWT    | 0.122 (0.0914-0.153)       | <b>7.49E-05</b> |
|                             | LAESD  | 0.0566 (0.0256-0.0876)     | <b>0.0681</b>   |
|                             | MV E/A | 0.00749 (-0.0214-0.0364)   | 0.796           |
|                             | RWT    | 0.141 (0.101-0.181)        | <b>0.000447</b> |
| <b>2.Deoxyuridine</b>       | IVS    | 0.0513 (0.0254-0.0772)     | <b>0.0476</b>   |
|                             | LVEDD  | 0.0212 (-0.00531-0.0477)   | 0.424           |
|                             | PWT    | 0.0723 (0.0465-0.098)      | <b>0.00506</b>  |
|                             | LAESD  | 0.0145 (-0.0114-0.0404)    | 0.576           |
|                             | MV E/A | 0.0277 (0.00351-0.0518)    | 0.252           |
|                             | RWT    | 0.0842 (0.051-0.117)       | <b>0.0113</b>   |
| <b>4.Acetamidobutanoate</b> | IVS    | 0.0579 (0.0275-0.0884)     | 0.0572          |
|                             | LVEDD  | -0.0292 (-0.0604-0.00196)  | 0.349           |
|                             | PWT    | 0.0522 (0.0219-0.0825)     | 0.0852          |
|                             | LAESD  | 0.0209 (-0.00959-0.0514)   | 0.493           |
|                             | MV E/A | -0.00272 (-0.031-0.0256)   | 0.923           |
|                             | RWT    | 0.115 (0.0747-0.156)       | <b>0.00449</b>  |
| <b>Methylhistidine</b>      | IVS    | -0.00246 (-0.0274-0.0225)  | 0.922           |
|                             | LVEDD  | 0.0559 (0.0304-0.0814)     | <b>0.0286</b>   |
|                             | PWT    | -0.0101 (-0.0349-0.0147)   | 0.685           |
|                             | LAESD  | 0.0418 (0.0169-0.0668)     | 0.0939          |
|                             | MV E/A | 0.0092 (-0.0141-0.0325)    | 0.692           |
|                             | RWT    | 0.0258 (-0.00642-0.0581)   | 0.423           |
| <b>N1.Acetylspermidine</b>  | IVS    | 0.0355 (0.0134-0.0577)     | 0.109           |
|                             | LVEDD  | -0.0161 (-0.0388-0.00662)  | 0.479           |
|                             | PWT    | 0.0305 (0.00839-0.0525)    | 0.168           |
|                             | LAESD  | 0.0681(0.0459-0.0902)      | <b>0.00215</b>  |
|                             | MV E/A | 0.0219 (0.00131-0.0425)    | 0.288           |
|                             | RWT    | 0.0438 (0.0153-0.0722)     | 0.124           |
| <b>DMGV</b>                 | IVS    | 0.0486 (0.0248-0.0724)     | <b>0.0412</b>   |
|                             | LVEDD  | -0.000574 (-0.0249-0.0238) | 0.981           |
|                             | PWT    | 0.0611 (0.0374-0.0848)     | <b>0.0099</b>   |
|                             | LAESD  | 0.0193 (-0.00459-0.0431)   | 0.42            |
|                             | MV E/A | -0.000787 (-0.0228-0.0212) | 0.971           |
|                             | RWT    | 0.0639 (0.0342-0.0937)     | <b>0.032</b>    |

|                                |        |                             |                 |
|--------------------------------|--------|-----------------------------|-----------------|
| <b>Diacetylspermine</b>        | IVS    | 0.000786 (-0.0194-0.0209)   | 0.969           |
|                                | LVEDD  | -0.0332 (-0.0538--0.0126)   | 0.107           |
|                                | PWT    | 0.0202 (0.000141-0.0403)    | 0.314           |
|                                | LAESD  | 0.0105 (-0.00966-0.0307)    | 0.602           |
|                                | MV E/A | 0.0147 (-0.00369-0.0332)    | 0.424           |
|                                | RWT    | 0.0436 (0.0175-0.0698)      | 0.0959          |
| <b>Uridine</b>                 | IVS    | 0.000828 (-0.0221-0.0237)   | 0.971           |
|                                | LVEDD  | -0.0486 (-0.0721--0.0251)   | <b>0.0385</b>   |
|                                | PWT    | -0.0016 (-0.0244-0.0212)    | 0.944           |
|                                | LAESD  | -0.0155 (-0.0384-0.0074)    | 0.499           |
|                                | MV E/A | -0.0151 (-0.0363-0.00611)   | 0.477           |
|                                | RWT    | 0.047 (0.0156-0.0785)       | 0.135           |
| <b>Choline</b>                 | IVS    | 0.0429 (0.02-0.0659)        | 0.0615          |
|                                | LVEDD  | 0.0154 (-0.00809-0.0389)    | 0.512           |
|                                | PWT    | 0.052 (0.0292-0.0749)       | 0.0228          |
|                                | LAESD  | 0.0223 (-0.000651-0.0453)   | 0.331           |
|                                | MV E/A | 0.0636 (0.0425-0.0848)      | <b>0.00269</b>  |
|                                | RWT    | 0.0718 (0.0428-0.101)       | <b>0.0135</b>   |
| <b>N.Acetyl.L.Alanine</b>      | IVS    | 0.0587 (0.0288-0.0887)      | <b>0.0499</b>   |
|                                | LVEDD  | -0.0109 (-0.0409-0.0191)    | 0.717           |
|                                | PWT    | 0.108 (0.0781-0.138)        | <b>0.000314</b> |
|                                | LAESD  | 0.000639 (-0.0288-0.0301)   | 0.983           |
|                                | MV E/A | 0.00528 (-0.0225-0.033)     | 0.849           |
|                                | RWT    | 0.0857 (0.0469-0.124)       | <b>0.0274</b>   |
| <b>N2.N2.dimethylguanosine</b> | IVS    | 0.0666 (0.0409-0.0924)      | <b>0.00967</b>  |
|                                | LVEDD  | -0.0203 (-0.0467-0.00607)   | 0.441           |
|                                | PWT    | 0.089 (0.0634-0.115)        | <b>0.000517</b> |
|                                | LAESD  | 0.0383 (0.0125-0.0642)      | 0.138           |
|                                | MV E/A | 0.0295 (0.00554-0.0534)     | 0.218           |
|                                | RWT    | 0.0901 (0.0567-0.124)       | <b>0.00712</b>  |
| <b>Ectoine</b>                 | IVS    | -0.0218 (-0.0432--0.000523) | 0.306           |
|                                | LVEDD  | 0.0251 (0.00325-0.0469)     | 0.251           |
|                                | PWT    | -0.0292 (-0.0504--0.00798)  | 0.169           |
|                                | LAESD  | 0.0504 (0.0291-0.0718)      | <b>0.0183</b>   |
|                                | MV E/A | -0.00494 (-0.0248-0.0149)   | 0.804           |
|                                | RWT    | 0.0185 (-0.00932-0.0463)    | 0.506           |
| <b>2.Amino adipic.acid</b>     | IVS    | 0.0404 (0.0194-0.0614)      | 0.0548          |
|                                | LVEDD  | -0.00413 (-0.0257-0.0174)   | 0.848           |

|                     |        |                            |               |
|---------------------|--------|----------------------------|---------------|
|                     | PWT    | 0.0482 (0.0273-0.0692)     | 0.0212        |
|                     | LAESD  | -0.00596 (-0.027-0.0151)   | 0.777         |
|                     | MV E/A | -0.0428 (-0.0622--0.0234)  | <b>0.0273</b> |
|                     | RWT    | 0.0422 (0.0161-0.0683)     | 0.106         |
| <b>Homoarginine</b> | IVS    | 0.023 (0.00137-0.0447)     | 0.288         |
|                     | LVEDD  | 0.0144 (-0.00778-0.0366)   | 0.516         |
|                     | PWT    | 0.0388 (0.0172-0.0604)     | 0.072         |
|                     | LAESD  | -0.0284 (-0.0501--0.00673) | 0.19          |
|                     | MV E/A | -0.000364 (-0.0205-0.0197) | 0.986         |
|                     | RWT    | 0.0589 (0.0321-0.0858)     | <b>0.0283</b> |

IVS: intraventricular septum; LVEDD: left ventricular end diastolic diameter (mm); PWT: posterior wall thickness (mm); LAESD: left atrial end systolic diameter (mm); RWT: relative wall thickness (mm)

**Table VI: Competing risk model for metabolites associated with incident heart failure, for incident HFpEF vs. HFrEF**

| Metabolites                    | HFrEF               |         | HFpEF               |         | Difference |
|--------------------------------|---------------------|---------|---------------------|---------|------------|
|                                | Hazard ratio        | P value | Hazard ratio        | P value | P value    |
| <b>Pseudouridine</b>           | 1.82 (1.53-2.16)    | 0.00046 | 1.35 (1.16-1.57)    | 0.049   | 0.311      |
| <b>2.Deoxyuridine</b>          | 1.53 (1.31-1.79)    | 0.0057  | 1.43 (1.26-1.63)    | 0.0063  | 0.793      |
| <b>4.Acetamidobutanoate</b>    | 1.45 (1.25-1.67)    | 0.0095  | 1.22 (1.06-1.41)    | 0.16    | 0.511      |
| <b>Methylhistidine</b>         | 1.29 (1.11-1.51)    | 0.1     | 1.26 (1.12-1.42)    | 0.046   | 0.952      |
| <b>N1.Acetylspermidine</b>     | 1.32 (1.17-1.49)    | 0.023   | 1.24 (1.13-1.37)    | 0.027   | 0.75       |
| <b>DMGV</b>                    | 1.52 (1.28-1.8)     | 0.014   | 1.21 (1.05-1.4)     | 0.17    | 0.287      |
| <b>Diacetylspermine</b>        | 1.32 (1.17-1.48)    | 0.016   | 1.29 (1.14-1.45)    | 0.042   | 0.903      |
| <b>Uridine</b>                 | 0.848 (0.76-0.947)  | 0.13    | 0.838 (0.757-0.927) | 0.081   | 0.983      |
| <b>Choline</b>                 | 1.19 (1.04-1.36)    | 0.19    | 1.33 (1.15-1.53)    | 0.042   | 0.59       |
| <b>N.Acetyl.L.Alanine</b>      | 1.58 (1.4-1.79)     | 0.00016 | 1.08 (0.879-1.33)   | 0.71    | 0.156      |
| <b>N2.N2.dimethylguanosine</b> | 1.32 (1.17-1.49)    | 0.025   | 1.17 (1.01-1.36)    | 0.3     | 0.619      |
| <b>Ectoine</b>                 | 1.11 (0.982-1.26)   | 0.39    | 1.33 (1.19-1.48)    | 0.01    | 0.366      |
| <b>2.Aminoadipic.acid</b>      | 0.872 (0.767-0.991) | 0.28    | 0.808 (0.698-0.937) | 0.15    | 0.699      |
| <b>Homoarginine</b>            | 0.747 (0.662-0.843) | 0.016   | 0.845 (0.759-0.941) | 0.12    | 0.481      |



**Table VII: Interaction analysis between metabolites, diabetic status and incident heart failure**

| Metabolite                     | Interaction HR* | Low 95%<br>CI | High 95%<br>CI | Interaction<br>P value* |
|--------------------------------|-----------------|---------------|----------------|-------------------------|
| <b>DMGV</b>                    | <b>1.48</b>     | <b>1.04</b>   | <b>2.12</b>    | <b>0.0302</b>           |
| <b>Choline</b>                 | 1.28            | 0.936         | 1.75           | 0.122                   |
| <b>2.Deoxyuridine</b>          | 1.21            | 0.919         | 1.58           | 0.176                   |
| <b>N1.Acetylspermidine</b>     | 0.853           | 0.651         | 1.12           | 0.248                   |
| <b>N2.N2.dimethylguanosine</b> | 1.15            | 0.899         | 1.47           | 0.266                   |
| <b>Diacetylspermine</b>        | 0.864           | 0.627         | 1.19           | 0.372                   |
| <b>Pseudouridine</b>           | 1.11            | 0.88          | 1.4            | 0.378                   |
| <b>Uridine</b>                 | 0.899           | 0.705         | 1.15           | 0.394                   |
| <b>N.acetylalanine</b>         | 0.888           | 0.675         | 1.17           | 0.399                   |
| <b>Homoarginine</b>            | 0.888           | 0.66          | 1.2            | 0.434                   |
| <b>Ectoine</b>                 | 1.12            | 0.825         | 1.52           | 0.467                   |
| <b>4.Acetamidobutanoate</b>    | 1.08            | 0.868         | 1.35           | 0.479                   |
| <b>2.Amino adipic.acid</b>     | 0.917           | 0.675         | 1.25           | 0.58                    |
| <b>Methylhistidine</b>         | 1.04            | 0.779         | 1.39           | 0.79                    |

\*Hazard ratio and p value is of the interaction term between metabolite and diabetes status

**Table VIII: Metabolites Associated with Incident Heart Failure and Left Ventricular Mass Index**

| <b>Metabolites</b>                      | <b><math>\beta</math>-coefficient</b> | <b>P value</b> |
|-----------------------------------------|---------------------------------------|----------------|
| <b>pseudouridine</b>                    | 0.0954 (0.0706-0.12)                  | 0.0001         |
| <b>2-deoxyuridine</b>                   | 0.0743 (0.05080.0979)                 | 0.0016         |
| <b>choline</b>                          | 0.0785 (0.0558-0.101)                 | 0.0005         |
| <b><i>N2-N2</i>-dimethylguanosine</b>   | 0.0724 (0.04920.0956)                 | 0.0018         |
| <b><i>N</i>-Acetyl-<i>L</i>-Alanine</b> | 0.0701 (0.04550.0946)                 | 0.0044         |
| <b>4-acetamidobutanoate</b>             | 0.0799 (0.0546-0.105)                 | 0.00164        |
| <b>uridine</b>                          | -0.065 (-0.088--0.042)                | 0.0047         |
| <b>DMGV</b>                             | 0.046 (0.024-0.0681)                  | 0.0366         |

Model adjusted for age, sex and batch



**Figure II: Pearson Correlation matrix between metabolites associated with incident heart failure and clinical risk factors**

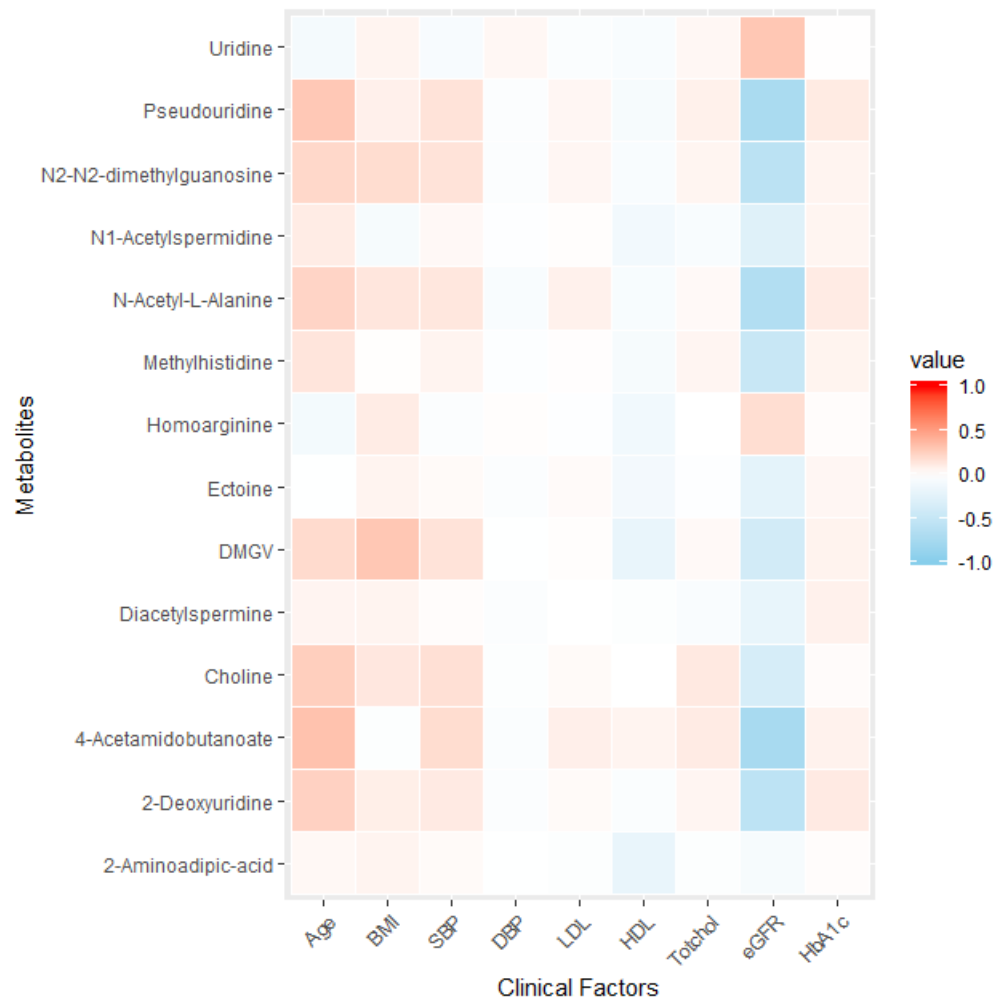

**Figure III: Pathway analysis for age and sex adjusted significant metabolites associated with incident heart failure**

The pathways enriched for incident heart failure (p value <0.05) are aminoacyl-tRNA synthesis, pyrimidine metabolism and lysine degradation.

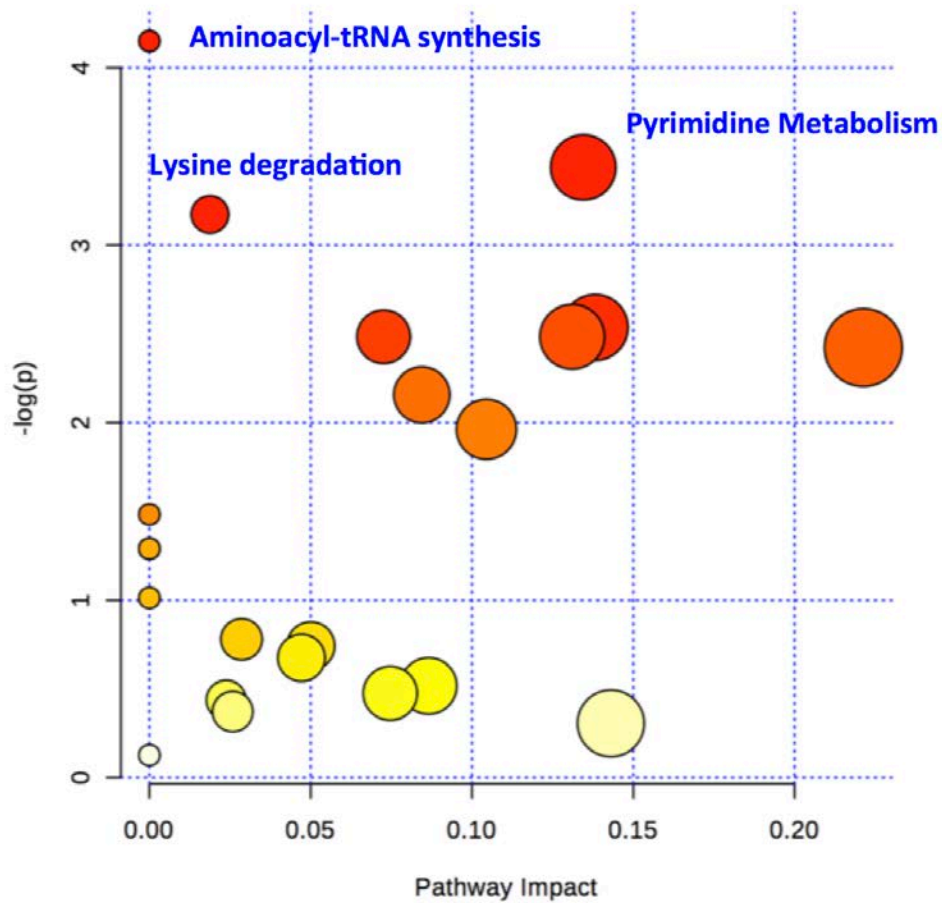

Supplement: NIHMS1654713-supplement-007275_supplemental_material.pdf [file NIHMS1654713-supplement-007275_supplemental_material.pdf]
